1 **Mixed cytomegalovirus genotypes in HIV positive mothers show compartmentalization and**  
2 **distinct patterns of transmission to infants.**

3

4 Juanita Pang<sup>1¶</sup>, Jennifer A. Slyker<sup>2¶</sup>, Sunando Roy<sup>1</sup>, Josephine Bryant<sup>1</sup>, Claire Atkinson<sup>3</sup>, Juliana  
5 Cudini<sup>1</sup>, Carey Farquhar<sup>4</sup>, Paul Griffiths<sup>3</sup>, James Kiarie<sup>5</sup>, Sofia Morfopoulou<sup>1</sup>, Alison C. Roxby<sup>4</sup>,  
6 Helena Tutil<sup>1</sup>, Rachel Williams<sup>1</sup>, Soren Gantt<sup>6</sup>, Richard A. Goldstein<sup>1&</sup>, Judith Breuer<sup>1&</sup>

7

8 <sup>1</sup>Division of Infection and Immunity, University College London, Cruciform Building, Gower St,  
9 London, WC1E 6BT

10 <sup>2</sup>Departments of Global Health and Epidemiology, University of Washington, Seattle WA, USA

11 <sup>3</sup>Institute of Immunology and Transplantation, Division of Infection and Immunity, University  
12 College London, Royal Free Campus

13 <sup>4</sup>Departments of Global Health, Epidemiology, Medicine (Div. Allergy and Infectious Diseases),  
14 University of Washington, Seattle WA, USA

15 <sup>5</sup>University of Nairobi, Department of Obstetrics and Gynaecology, Kenya, World Health  
16 Organization

17 <sup>6</sup>Research Centre of the Sainte-Justine University Hospital, Department of Microbiology,  
18 Infectious Diseases and Immunology, University of Montréal QC, Canada

19 \*Corresponding author. Email: [j.breuer@ucl.ac.uk](mailto:j.breuer@ucl.ac.uk)

20 <sup>¶</sup>These authors contributed equally to this work.

21 <sup>&</sup>These authors also contributed equally to this work.

22

23 **Abstract**

24 Cytomegalovirus (CMV) is the most congenital infection (cCMVi), and is particularly common  
25 among infants born to HIV-infected women. Studies of cCMVi pathogenesis are complicated by  
26 the presence of multiple infecting maternal CMV strains, especially in HIV-positive women, and  
27 the large, recombinant CMV genome. Using newly-developed tools to reconstruct CMV  
28 haplotypes, we demonstrate anatomic CMV compartmentalization in five HIV-infected mothers,  
29 and identify the possibility of congenitally-transmitted genotypes in three of their infants. A  
30 single CMV strain was transmitted in each congenitally-infected case, and all were closely related  
31 to those that predominate in the cognate maternal cervix. Compared to non-transmitted strains,  
32 these congenitally-transmitted CMV strains showed statistically significant similarities in 19  
33 genes associated with tissue-tropism and immunomodulation. In all infants, incident  
34 superinfections with distinct strains from breast milk were captured during follow-up. The results  
35 represent potentially important new insights into the virologic determinants of early CMV  
36 infection.

37

## 38 **Introduction**

39 Human cytomegalovirus (CMV) is the commonest infectious cause of congenitally-acquired  
40 disability [1]. Between 0.2% and 2% of all live births have congenital CMV infection (cCMVi), and  
41 of these an estimated 15%-20% develop permanent sequelae ranging from sensorineural hearing  
42 loss to severe neurocognitive impairment [2, 3]. Maternal coinfection with HIV, even when  
43 mitigated by antiretroviral treatment, is associated with higher CMV viral loads in plasma, saliva,  
44 cervix and breast milk, and a greater risk of both congenital and postnatal CMV transmission [4-  
45 7]. Numerous studies have highlighted the negative health impacts of CMV on both HIV-infected  
46 and HIV-exposed uninfected (HEU) infants and children [8-10].

47

48 Primary maternal CMV infection during pregnancy confers a 30%-40% risk of transmission to the  
49 fetus [11]. Pre-existing maternal CMV immunity appears to reduce the risk of cCMVi, though it is  
50 clearly imperfect [12]. Due to their abundance in the community, over two-thirds of infants with  
51 cCMVi are born to seropositive women, and the overall risk of cCMVi is directly proportional to  
52 the maternal seroprevalence in a population [13]. Increasing evidence points to the importance  
53 of maternal CMV reinfection with new antigenic strains during pregnancy as a major risk factor  
54 for non-primary cCMVi [12, 14]. Evidence that household children may be a source of maternal  
55 reinfection provides additional support for this hypothesis [15, 16].

56

57 The CMV genome is the largest of the human herpesviruses. Regions of extensive sequence  
58 variability together with high levels of recombination between different strains results in high  
59 diversity for a DNA virus [17-19]. Individuals are often infected with multiple CMV strains. We

60 have recently demonstrated that separate CMV haplotypes can be resolved from high-  
61 throughput sequencing (HTS) data [20]. This advance, by enabling tracking of individual genomes  
62 within mixed CMV infections, has already revealed the impact of mutation, recombination and  
63 selection in shaping the course of infection [20]. Here we apply these methods to CMV genomes  
64 sequenced from samples from five HIV-infected women and their infants that were collected  
65 between 1993 and 1998 originally for studies of maternal-infant HIV transmission [7]. By  
66 reconstructing genome-wide haplotypes from these longitudinal samples, we are able to  
67 examine the diversity of CMV shed by HIV-infected women and the specific genotypes that are  
68 transmitted in congenital and postnatal infections, and to reconstruct the likely chronology with  
69 which specific CMV variants were transmitted from mothers to infants.

70

## 71 **Results**

### 72 **Participant characteristics, sampling, depth of sequencing**

73 Details of the study cohort, follow-up, sample collection, and HIV and CMV infection status and  
74 transmission have been previously described [21-23]. Sufficient residual sample was available  
75 from the five families analysed here. To maximise the chance of recovering near full genomes,  
76 we selected samples reported in the original publication [22] to have  $> 10^3$  copies/ml, as this is  
77 the limit at which we generally can generate whole genomes from blood. Of the five mother-  
78 infant pairs analysed, four infants were HIV-exposed uninfected (HEU) (Infants 22, 123, 41, 14),  
79 and one was HIV-infected (Infant 12).

80

### 81 **CMV viral loads and sequencing**

82 Cervical, breast milk, and blood viral loads, and time of sample collection for the five mother-  
83 infant pairs studied are shown in Fig. 1. The percentage of genome coverage and mean read  
84 depths are shown in Table 1. While breast milk samples had greater than 70% coverage at depths  
85 of 10x or more, the cervical and infant samples were of generally of lower depth, likely due to  
86 degradation of DNA due to the age and handling of the samples; genome coverage and mean de-  
87 duplicated read depth were directly related to actual CMV genome copy number present in the  
88 input material (Fig. S1). For all subsequent analysis, we removed samples with genome coverage  
89 of less than 20%. Fourteen of the remaining 20 cervical and baby samples had genome coverage  
90 above 70% and read depths of greater than 10x (Table 1).

91 **Fig. 1.** Viral loads of longitudinal samples for each family from breast milk (red), baby blood spots (green) and cervix (blue). Vertical grey line indicates date of delivery. Red circles indicate the  
92 (green) and cervix (blue). Vertical grey line indicates date of delivery. Red circles indicate the  
93 samples that were submitted for whole genome sequencing.

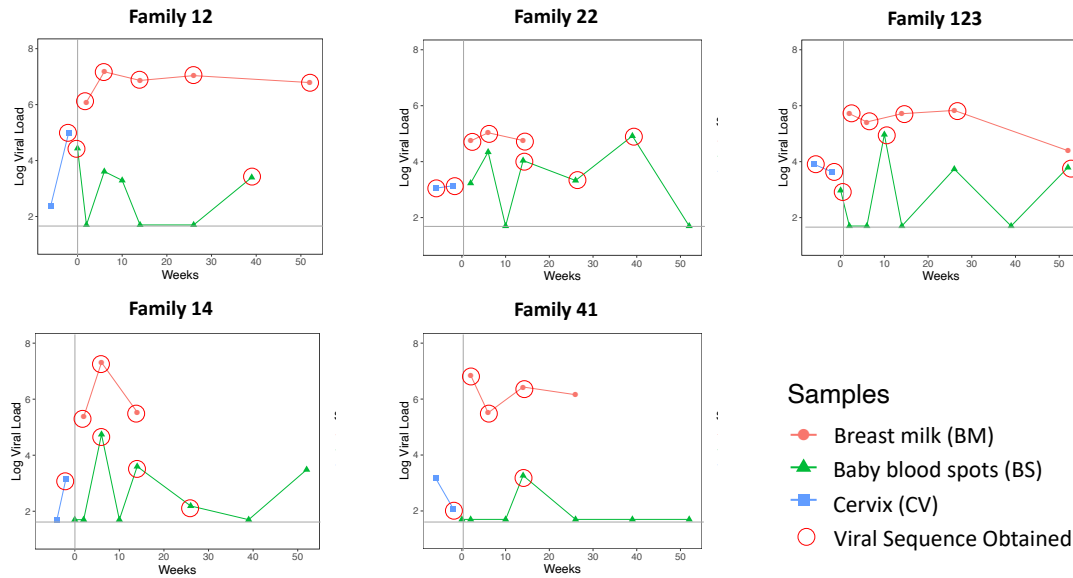

96 **Fig. S1.** Scatter plots showing relationship between input viral load and (A) mean read depth and  
97 (B) genome coverage respectively.

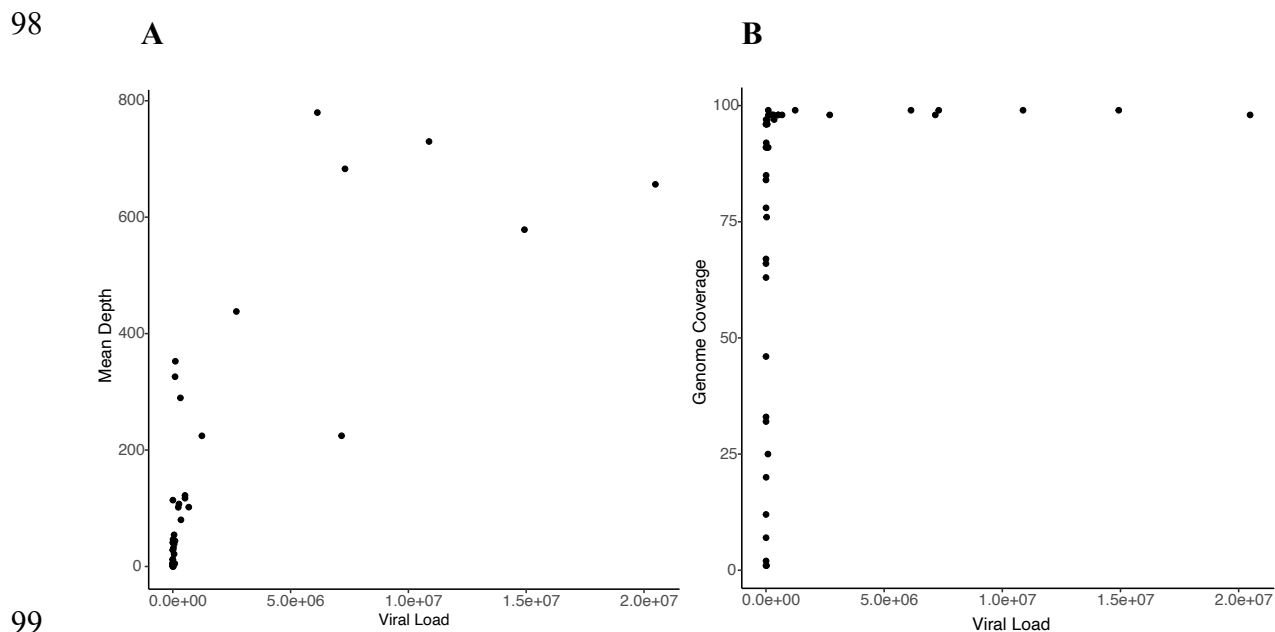

100 **Table 1.** Sequencing characteristics for samples from each family. OTR: on target read; %  
 101 Genome: % of genome coverage; % Dup: % of duplicated reads. Samples with genome coverages  
 102 too low to be included in any analysis are shaded in grey. Cervical or baby samples with good  
 103 coverage and read depth are highlighted in yellow.

| Sample              | %OTR  | %Genome | %Dup  | Mean Depth | Viral Load |
|---------------------|-------|---------|-------|------------|------------|
| <b>Family 12</b>    |       |         |       |            |            |
| Breast milk 2W      | 26.41 | 99      | 29.49 | 224.45     | 1235136.63 |
| Breast milk 6W      | 68.99 | 99      | 13.84 | 578.56     | 14926741   |
| Breast milk 14W     | 76.4  | 99      | 5.02  | 683.04     | 7309960    |
| Breast milk 6M      | 77.47 | 99      | 8.07  | 730.04     | 10876521   |
| Breast milk 12M     | 77.81 | 99      | 7.68  | 779.72     | 6135712.5  |
| Cervix 38W Pregnant | 14.73 | 99      | 47.56 | 325.97     | 95842      |
| Baby Delivery       | 1.35  | 76      | 82.27 | 31.86      | 27393.9395 |
| Baby 6W             | 0.02  | 2       | 81.79 | 0.29       | 4067.86694 |
| Baby 10W            | 0.1   | 12      | 77.77 | 2.63       | 1959.9679  |
| Baby 9M             | 1.1   | 78      | 79.41 | 28.53      | 2501.75195 |
| <b>Family 14</b>    |       |         |       |            |            |
| Breast milk 2W      | 13.54 | 98      | 65.41 | 101.66     | 232442.219 |
| Breast milk 6W      | 60.32 | 98      | 49.85 | 656.47     | 20485190   |
| Breast milk 14W     | 11.15 | 97      | 65.77 | 80.09      | 345851.781 |
| Cervix 38W Pregnant | 0.22  | 63      | 56.04 | 4.34       | 1377       |
| Baby 6W             | 1.4   | 91      | 69.35 | 21.35      | 55400.7148 |
| Baby 14W            | 3.33  | 96      | 78.59 | 113.92     | 3960.64233 |
| Baby 6M             | 0.34  | 66      | 74.11 | 11.42      | 154.414169 |
| Baby 12M            | 0.02  | 7       | 75.97 | 0.75       | 3054.47485 |
| <b>Family 22</b>    |       |         |       |            |            |
| Breast milk 2W      | 6.08  | 96      | 34.22 | 54.34      | 55000.2891 |
| Breast milk 6W      | 43.18 | 98      | 44.57 | 352.49     | 107861.141 |
| Breast milk 14W     | 6.4   | 97      | 44.41 | 38.3       | 56883.9805 |
| Cervix 34W Pregnant | 0.16  | 46      | 54.95 | 2.97       | 1125       |
| Cervix 38W Pregnant | 0.16  | 67      | 47.91 | 4.14       | 1377       |
| Baby 2W             | 0.01  | 1       | 46.34 | 0.03       | 1703.49292 |
| Baby 6W             | 0.08  | 1       | 43.61 | 0.03       | 22082.6465 |
| Baby 14W            | 2.29  | 92      | 79.42 | 46.53      | 10962.7197 |
| Baby 6M             | 0.3   | 33      | 79.36 | 5.98       | 2124.86548 |
| Baby 9M             | 0.22  | 25      | 79.33 | 5.01       | 82937.5    |
| <b>Family 41</b>    |       |         |       |            |            |
| Breast milk 2W      | 43.33 | 98      | 60.89 | 224.53     | 7163743    |
| Breast milk 6W      | 37.05 | 98      | 61.89 | 289.61     | 323325.531 |
| Breast milk 14W     | 48.15 | 98      | 68.02 | 438.05     | 2697832.75 |
| Cervix 38W Pregnant | 0.61  | 91      | 47.53 | 12.6       | 122        |
| Baby 14W            | 0.12  | 32      | 74.47 | 4.67       | 1848.62402 |
| <b>Family 123</b>   |       |         |       |            |            |
| Breast milk 2W      | 16.11 | 98      | 60.11 | 117.25     | 518071.875 |
| Breast milk 6W      | 16.96 | 98      | 64.77 | 107.35     | 262400.719 |
| Breast milk 14W     | 13.95 | 98      | 64.01 | 122.08     | 518071.875 |
| Breast milk 6M      | 15.81 | 98      | 63.07 | 101.92     | 678250.313 |
| Cervix 34W Pregnant | 2.45  | 97      | 49.46 | 41.91      | 7931       |
| Cervix 38W Pregnant | 1.36  | 96      | 49.61 | 28.07      | 4326       |
| Baby Delivery       | 0.21  | 84      | 10.93 | 6.1        | 939.190735 |
| Baby 10W            | 2.19  | 91      | 78.64 | 43.96      | 93297.3047 |
| Baby 6M             | 0.13  | 20      | 77.67 | 3.1        | 5428.83545 |
| Baby 12M            | 1.36  | 85      | 80.13 | 40.56      | 6205.88281 |

104

105

106 **CMV genome sequence relatedness and diversity**

107 We used multidimensional scaling to cluster CMV genomic sequences by nucleotide similarity  
108 (Fig. 2), as use of phylogenetic trees is problematic due to the high levels of CMV recombination.  
109 Sequences from families 12, 14 and 41 all clustered by family. Family 22 and 123 clustered in two  
110 distinct spaces, suggesting infection with more than one strain. In all five cases, the first sample  
111 from each infant (indicated by an arrow) clustered most closely with that of its mother, indicating  
112 the likelihood of recent maternal-infant transmission.

113

114 **Fig. 2.** Multidimensional scaling showing clustering of consensus genome sequences for each  
115 sample by family. Arrows indicate that the first baby blood spot clusters with their own maternal  
116 sequences in all cases.

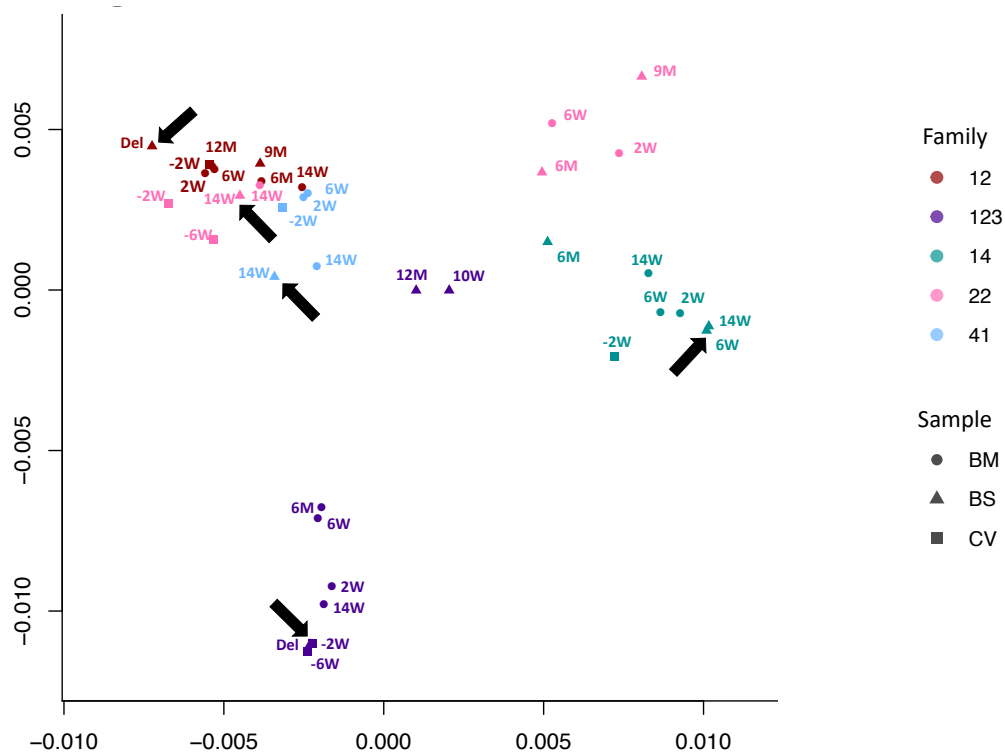

117

118



119 To further investigate the possibility of mixed infections, we calculated the within-sample  
120 nucleotide diversity, a metric that we have shown previously can be used as a proxy for the  
121 likelihood of mixed strain infections [20]. Fig. S2 shows that almost all the breast milk samples  
122 were highly diverse and therefore likely to contain multiple virus strains, a finding consistent with  
123 previous analyses of breast milk from HIV-infected women [24]. In contrast, the cervical and  
124 infant samples with the exception of one cervical sample from family 12, showed lower diversity.  
125 We used subsampling to demonstrate that computed nucleotide diversities are robust down to  
126 sequencing depths of >10 (Fig. S3). Low diversity was also observed in cervical and blood spots  
127 with higher coverage and read depths (Table 1).

128

129 **Fig. S2.** Within sample nucleotide diversity shown by family (colour) and sample type (symbol).  
130 BM; breast milk, CV; cervix, BS; baby blood spot. The figure shows that most cervical and blood  
131 spot samples are of low diversity, while most breast milk samples are of high diversity

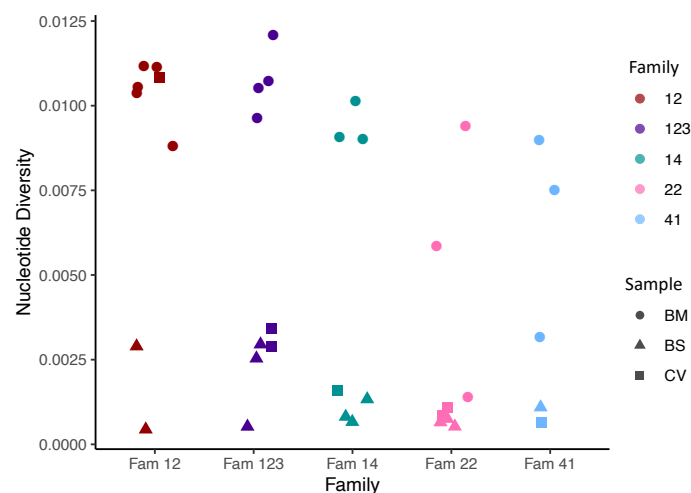

132

133

134 **Fig. S3.** Effect of down-sampling on estimated diversity. Samples tested include family 14 14W  
135 BS (green squares), family 41 14W BM (blue dots), family 14 6W BM (green triangles), family  
136 12 12M BM (maroon diamonds) all of which had initial read depths of 150 or more. The estimated  
137 diversity is relatively insensitive to read depth; in particular, down-sampling of high read-depth  
138 samples shows no tendency of the analysis to underestimate the diversity of low read-depth  
139 samples. This indicates that the low diversity observed in many of the CV and BS samples is not  
140 an artefact but is rather consistent with the presence of significant bottlenecks.

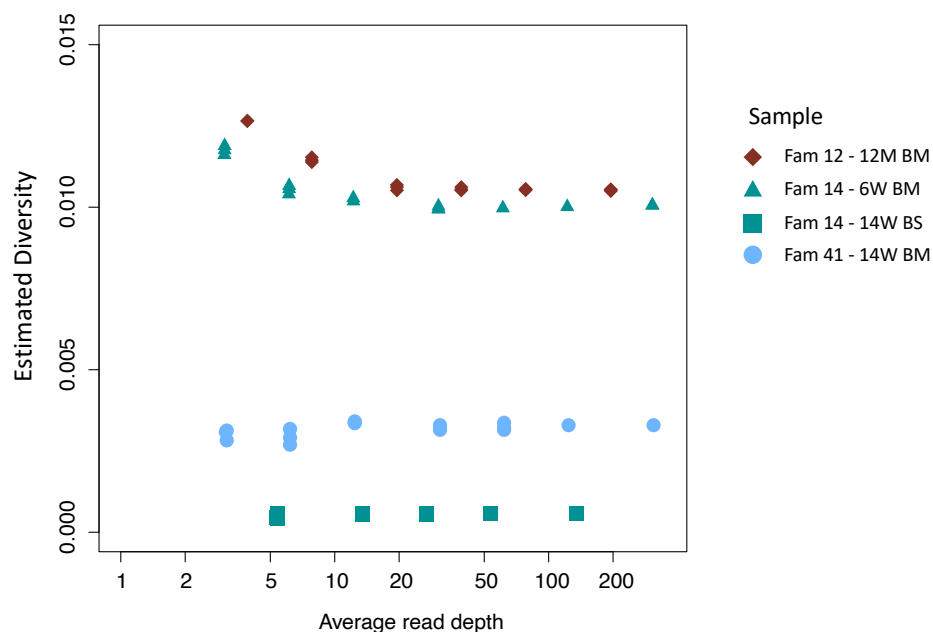

141  
142  
143 **Reconstruction of individual haplotypes reveals CMV compartmentalization**  
144 To resolve the individual viral sequences (haplotypes) within each sample, we used our previously  
145 described method HaROLD [25]. Fig. 3 shows that haplotypes for each sample tended to cluster  
146 by family group albeit with clear evidence of distinct clusters even within a family e.g. family 22.

147 **Fig. 3.** Multidimensional scaling showing clustering of haplotype sequences by family. Colours  
148 indicate the families, shapes indicate the types of sample.

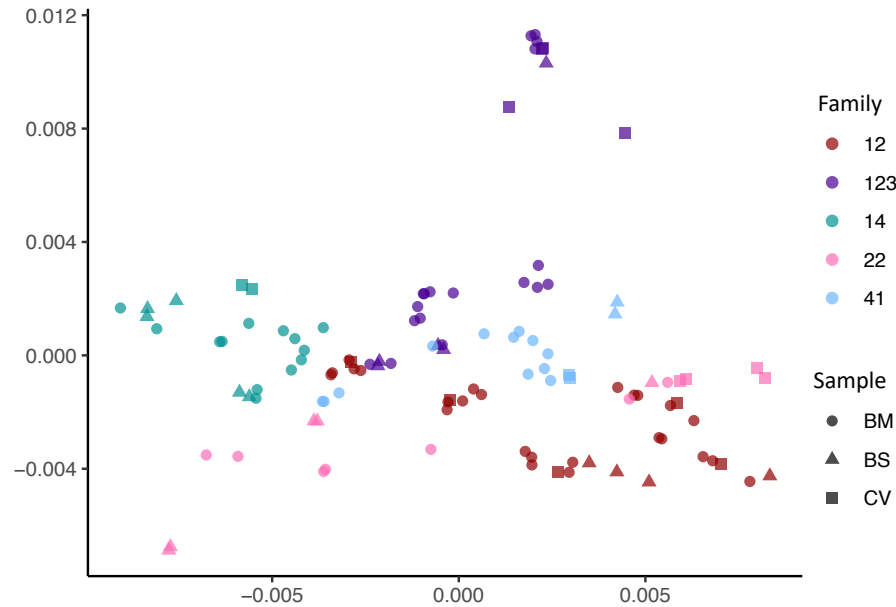

149

150

151 The presence of mixed infections within a single family was supported by data showing that a  
152 subset of the sequence haplotypes within each family had pairwise distances as great as those  
153 between unrelated GenBank sequences (Fig. S4). Within-family phylogenetic analysis (Fig. S5)  
154 shows distinct clusters of the phylogenetically related sequence haplotypes recovered from  
155 breast milk, cervix and baby, likely to represent variants forming distinct viral strains (Fig. S5).  
156 Based on the distribution of pairwise distances (see Methods), we clustered similar haplotypes  
157 together into strains henceforth termed genotypes. In no cases did haplotypes from different  
158 families fulfil our clustering criterion confirming that haplotypes were not shared between  
159 unrelated families.

160

161 For ease of reference, genotypes were colored differently, with the genotype predominating in  
162 the first cervical sample of each family colored red (Fig. S5). Other genotypes were colored by  
163 their phylogenetic and pairwise distances from this genotype (Fig. S5). From our data, we  
164 identified a total of 26 genotypes with between 3 and 9 genotypes for each family (Fig. S5).

165

166 **Fig. S4.** Pairwise differences between haplotypes within a family. Distances are compared with  
167 random GenBank sequences and sequences previously analyzed by the same pipeline and  
168 reported [20]. Higher values are similar to those seen between unrelated database sequences and  
169 indicate the presence of distinct strains.

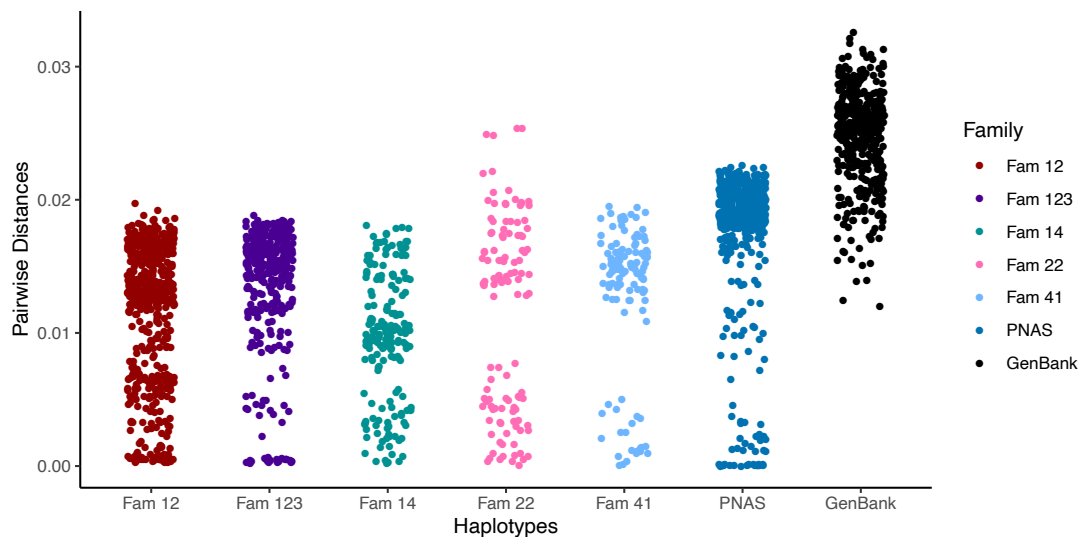

170

171

172 **Fig. S5.** Maximum-likelihood phylogenetic tree to show haplotypes clusters (genotypes). By  
173 convention, the genotype most prevalent in cervix was colored red for each family. Genotypes  
174 were designated where a distinct cluster of related haplotypes (pairwise distance  $\leq 0.017$ )  
175 occurred with a bootstrap value of 100 (see methods and supplementary figure 8). The genotype  
176 containing the most abundant haplotype present in the cervix is coloured red for each family.

177 Thereafter sequences that are genetically closest to the red genotype are coloured magenta.  
178 Genotypes that are as distant from the cervical genotype as unrelated GenBank sequences are  
179 coloured shades of green, blue and purple. The number of clusters between 18 and 34 did not  
180 affect subsequent conclusions about genetic similarity between cervical versus other strains (see  
181 Fig. S8).

Family 12

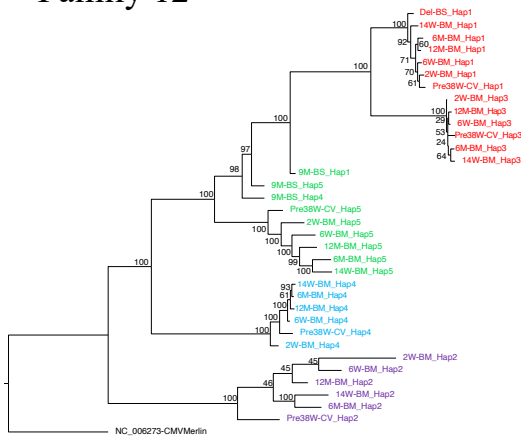

Family 22

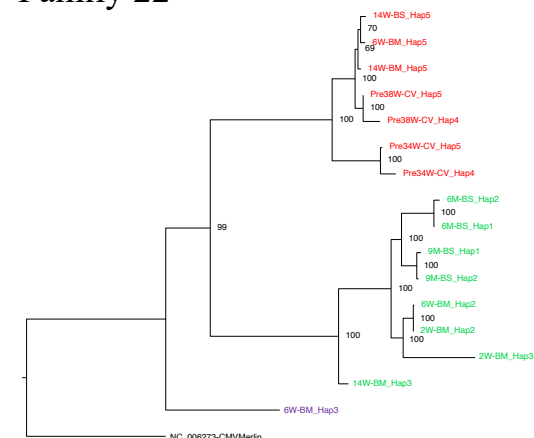

Family 123

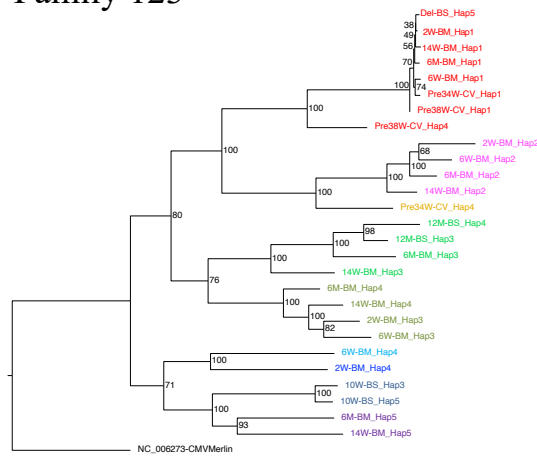

Family 14

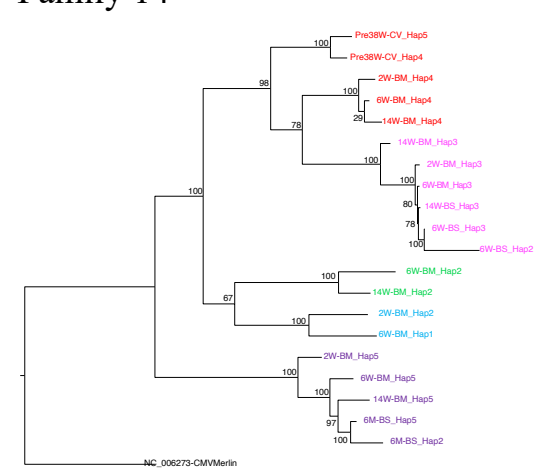

Family 41

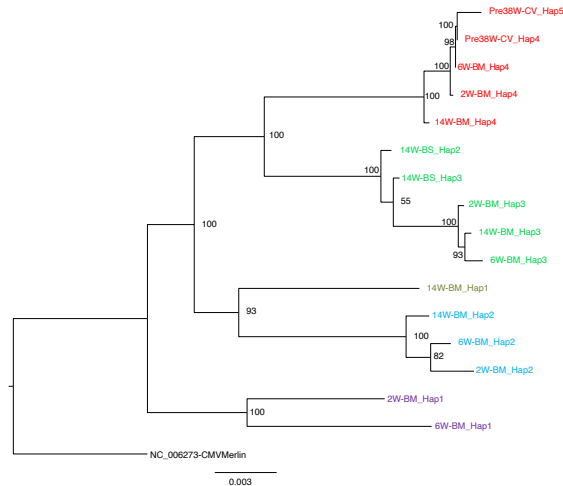

187

188 To elucidate the relationship between maternal and infant genotypes, we plotted the abundance  
189 of each within a sample over time (Fig. 4). All five mothers were infected with multiple genotypes  
190 in breast milk. In many cases genotypes within a single maternal sample were as genetically  
191 distant as unrelated database sequences, suggesting the presence of multiple distinct CMV  
192 strains (Fig. S5, Fig. 4). Relative genotype abundances present in breast milk changed over time.  
193 One unique genotype appeared in the breast milk of mother 22 at 6 weeks, disappearing from a  
194 subsequent sample (Fig. 4). This genotype was genetically distinct not only from other genotypes  
195 in family 22 but from genotypes in all other families, reducing the likelihood that it was a  
196 contaminant and may therefore have represented a new reinfection or reactivation of pre-  
197 existing latent infection. All cervical samples showed a single dominant genotype (Fig. 4),  
198 including mother 12, whose sample was more diverse and found to contain low levels of other  
199 genotypes. Overall, the data point to compartmentalization of CMV populations between cervix  
200 and breast milk.

201

202 **Fig. 4.** Abundance of haplotypes within each sample plotted for breast milk (BM), Cervix (CV)  
203 and Blood spots (BS). The timing of sampling is shown along the x axis. For ease of reference, the  
204 genotype containing the most abundant haplotype present in the cervix is coloured red for each  
205 family. Thereafter sequences that are genetically closest to the red genotype (Fig S5) are coloured  
206 magenta. Genotypes that are as distant from the cervical genotype as unrelated GenBank sequences  
207 are coloured shades of green, blue and purple. Single variants are coloured in shades of the nearest  
208 genotype.

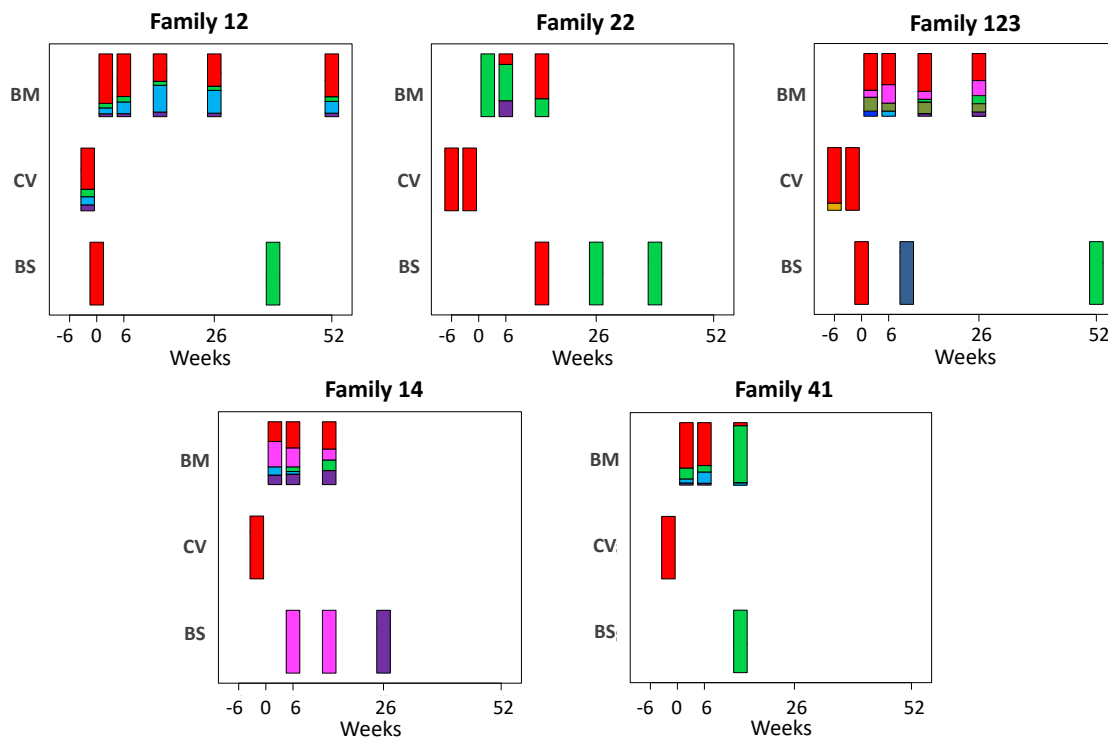

209

210

### 211 **Transmission bottlenecks**

212 CMV genomes from individual infant blood spots also showed lower diversity (Fig. S2), and  
213 predominance of one genotype (Fig. 4), including in samples with good sequence read depth e.g.  
214 Baby12 DEL and 9M, Baby14 6W,14W and 6M, Baby22 14W, Baby123 10W and 12M, (Table 1),

215 indicating the likelihood of a bottleneck in mother-to-child transmission. Two infants (families 12  
216 and 123 Fig. 1) who tested positive at birth were first infected with the genotype present in the  
217 greatest abundance in the cervix (Fig. 4 and Fig. S5). The same pattern was found in a third infant  
218 (family 22) whose first sample at two weeks of age tested positive (Figs. 2, 4 and S5).  
219 Interestingly, all three of these congenitally-infected infants were subsequently re-infected with  
220 distinct genotypes present in breast milk (Fig. 4). Two infants with initially two (family 14) and  
221 three (family 41) negative tests from birth onwards, first became positive at 6 and 10 weeks  
222 respectively. The genotypes detected in the blood spots from both of these infants were present  
223 in breast milk and differed from the most abundant genotype in cervix (Fig. 4).

224

#### 225 **Subsampling to control for the impact of read depths**

226 To determine the degree to which results were affected by the quality of sequence, we  
227 subsampled reads of different samples to show that sample diversity calculations are robust at  
228 read depths of  $\geq 5$  (Fig. S3); eight of the 18 blood spots and four of seven cervical samples had  
229 mean read depth  $\geq 10$  (Table 1) and all except one were of low diversity (Fig. S2). To determine  
230 the extent to which read depth affected haplotype frequencies, the 12-month breastmilk sample  
231 from mother 12, which had a mean read depth of 779.72 and five haplotypes (Fig. S5), was  
232 subsampled down to mean read depth  $< 4$  (Fig. S6). All of the haplotypes in this sample were  
233 present for read depths of 22 or more, with three haplotypes identified even at the lowest read  
234 depth. Nine out of ten cervical and blood spot samples from four families with read depths of  
235  $> 20$  (Table 1), had either single genotypes or multiple closely related variants (Fig. 4) supporting  
236 previous conclusions around compartmentalization and transmission bottlenecks [26].



237

238 **Fig. S6.** Boxplot showing number of haplotypes reconstructed in relation to read depth. Analysis

239 was performed on the 12-month breastmilk sample from family 12.

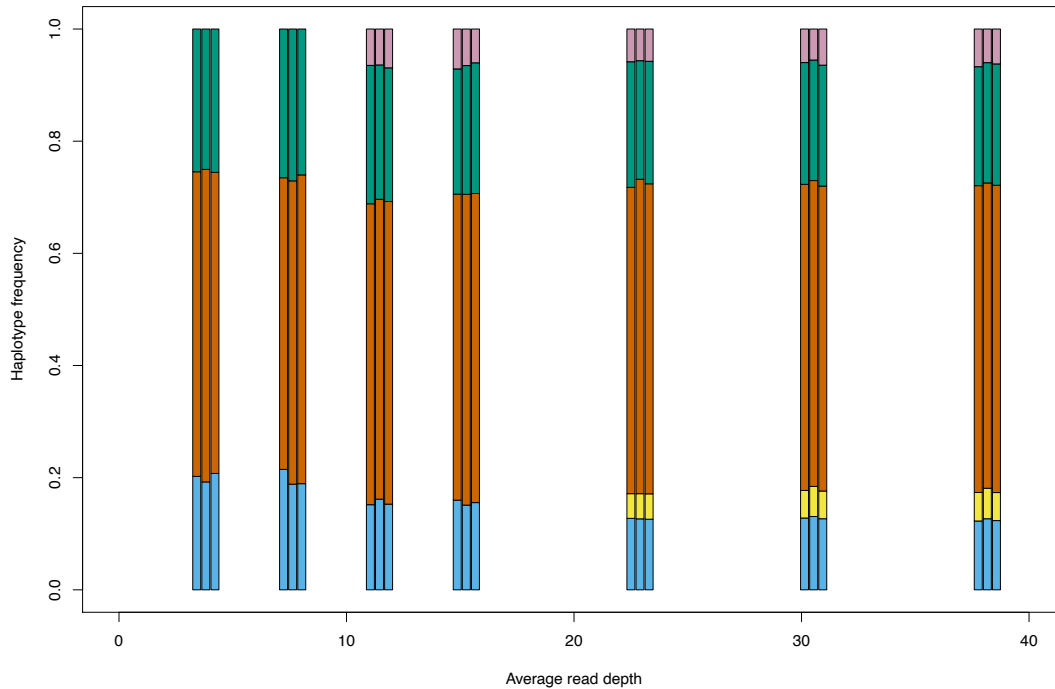

240

### 241 **Genotype compartmentalization**

242 To look for evidence of inter-patient viral convergence by compartment, as has been observed

243 previously [19], we used fixation index (FST) to compare the genetic similarity of individual genes

244 of all subsets of two to five genotypes derived from different mother-baby pairs. P-values and

245 false discovery rates for each pair were calculated using non-parametric bootstrapping. In order

246 to compare various subsets, we computed a confidence weighted sum of FST (cwsFST) values for

247 each subset. The distribution of cwsFST values is shown in Fig. S7. As can be seen, there are a

248 large number of subsets with significant cwsFST values, far in excess of what is observed for

249 scrambled sequences.

250

251 Fig. S7: Distribution of confidence-weighted sums of FST (cwsFST) values for all subsets of two  
252 (cyan), three (purple), four (green) and five (magenta) genotypes from different mother-baby  
253 pairs. For comparison, we also show the distribution obtained when the genotype sequences  
254 corresponding to each mother-baby pair are scrambled (black line). Arrows mark the values for  
255 the five genotypes that predominated in the cervical samples (black), the three predominant  
256 genotypes from cervical samples for mother-baby pairs 12, 22, and 123 (blue), and the two  
257 predominant genotypes from cervical samples for mother-baby pairs 14 and 41 (red).

258

259

260

261

262

263

264

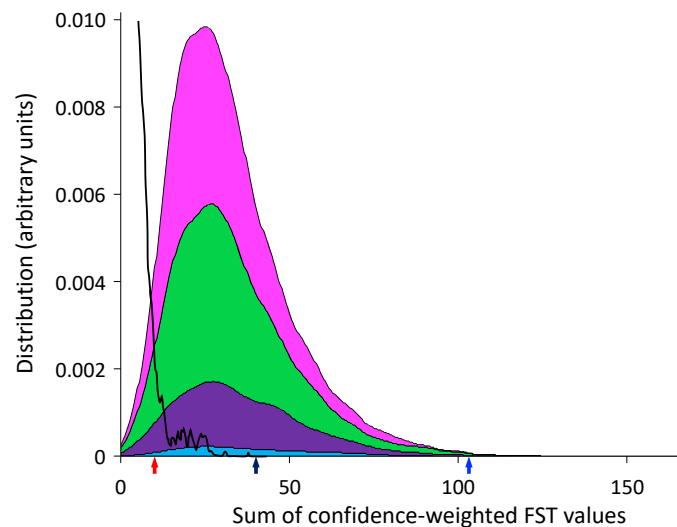

265

266

267 The sum weighted FST value for the subset of five genotypes that predominated in the cervical  
268 samples was not significantly different from other subsets, suggesting overall, that genotypes  
269 that predominated in the cervix of these women were not more closely related than genotypes  
270 found in breast milk. Intriguingly, however, the subset of cervical genotypes from mother-baby  
271 pairs 12, 22, and 123 had a sum weighted FST with a value greater than 99.6% of the other

272 subsets, indicating a strong signal of inter-patient viral convergence. These genotypes were from  
273 the three mother-baby pairs with proven congenital infection based on first detection of CMV in  
274 the baby at  $\leq 2$  weeks of age, and in whom the baby's genotype was identical to that  
275 predominating in cervix. In contrast, the predominant cervical genotypes from patients 41 and  
276 14 showed low levels of relatedness with the first positive infant blood spot; these infant strains  
277 were more closely related to those from their mothers' breast milk (Figs. 4 and S5).

278

279 The  $F_{ST}$  analysis identified 19 genes as likely to be contributing to the genetic similarity between  
280 congenitally transmitted genotypes from mothers 12, 22, 23 ( $FDR < 0.05$ ) (Fig. 5). The comparison  
281 between these congenitally-transmitted and other genotypes generally yielded the same genes  
282 when the pairwise difference was varied to cluster haplotypes into more or fewer genotypes (Fig  
283 S8), suggesting that this finding is not an artefact of decisions about haplotype clustering.

284

285 **Fig S8.** Heatmap showing genes identified as significant in  $F_{ST}$  analysis are robust to changes in  
286 the number of clusters. Colors indicated the false discovery rate value, red =  $< 0.001$ ; magenta =  
287 0.001-0.01; pink = 0.01-0.05; purple = 0.05-0.1; blue = 0.1-0.2; grey =  $> 0.2$ .

288

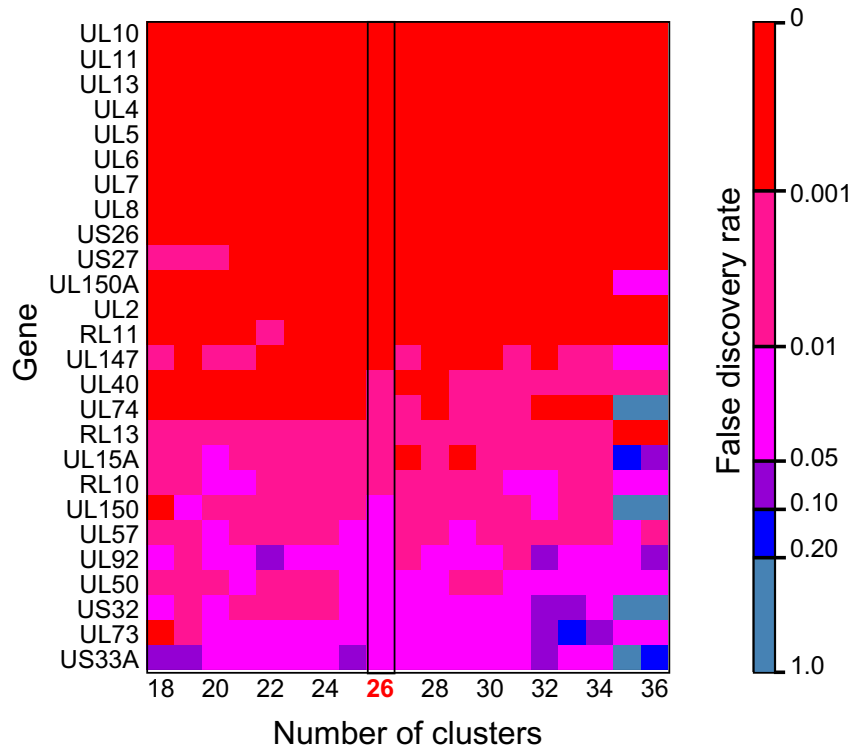

289

290 **Fig. 5.** The magnitude of FST values plotted for each gene (x axis). P values, adjusted with false  
 291 discovery rate are shown in Red for  $p < 0.01$ , Grey for  $p > 0.05$  and turquoise for  $p = 0.01 - 0.05$ .

Figure 5

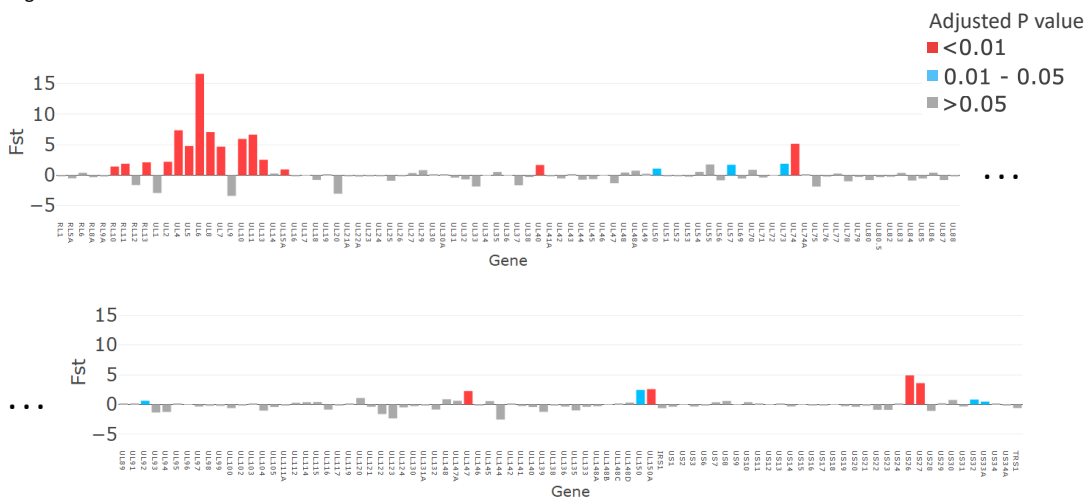

292

## 293 **Discussion**

294 We used next generation sequencing and haplotype reconstruction of individual CMV genomes,  
295 obtained from samples of HIV-infected women and their infants, to identify mixed infections,  
296 compartmentalization and distinct viral-genotype associations with transmission of CMV from  
297 mother-to-infant. Breast milk CMV showed high nucleotide diversity and, as has been previously  
298 reported [24], contained a mixture of viral genotypes, some of which were as genetically distant  
299 from each other as unrelated GenBank sequences and can therefore be considered distinct viral  
300 strains. Cervical samples were of low nucleotide diversity and dominated by a single viral  
301 genotype that was, with one exception, present in lower abundance in breast milk. Our data fit  
302 with most but not all [27] previous reports of CMV within-host compartmentalization based on  
303 genotyping of subgenomic fragments [28-31]. We found little evidence for widespread new  
304 superinfecting or reactivating viruses in these mothers. In line with findings from the  
305 immunosuppressed RhCMV monkey model of congenital infection, cCMVi [32] genotypes  
306 (strains) comprised families of closely related haplotypes. However, unlike the finding for  
307 congenitally transmitted gB and gL RhCMV variants, even where we found transmission of one  
308 genotype, maternal and infant haplotypes were not completely identical either in early,  
309 potentially congenital CMV infections, or in postnatally transmitted viruses from breastmilk.  
310 Neither were haplotypes sampled at different times from maternal breast milk conserved,  
311 suggesting a measure of de novo mutation in this patient group, in line with previous findings  
312 [19].

313

314 Our method of reconstructing viral haplotypes in serial samples provides insights into the natural  
315 history of CMV infection. While all mothers had mixtures of genotypes in breastmilk, the  
316 proportions changed over time for some (family 22 and 41) and remained more stable in others.  
317 Whether expanding genotypes in mothers 22 and 41 had been recently acquired is not known  
318 but would be consistent with incident reinfection. In contrast, all infants were initially infected  
319 with a single genotype (Fig. 4), supporting a bottleneck to CMV transmission [20, 32,  
320 33]. Apparent reinfection by viruses present in breast milk occurred in all four infants with  
321 multiple samples (Fig. 4). We posit that the appearance of a new strain in an infant sampled from  
322 birth can confidently be interpreted as a newly-acquired exogenous virus rather than reactivation  
323 of a previously undetected one. In all cases, the reinfecting strains were genetically distant from  
324 and replaced the previously dominant strain (Fig. 4). Taken together with the rise and fall of infant  
325 CMV viral loads over time (Fig. 1), this pattern is consistent with immunity against the infants'  
326 first CMV strain not being protective against reinfection with antigenically distinct strains, a  
327 concept that can be further tested. Of note, reinfection with the closely related strains also  
328 appears to occur readily with both human CMV and in animal models [15, 34]. Repeated  
329 reinfection with distinct strains may explain the high genetic variability observed between  
330 sequential samples in early sequencing studies of CMV genomes from congenitally-infected  
331 infants [18, 31].

332• Those infants who tested positive at <3 weeks from birth were congenitally-infected by  
333 definition[14]. In contrast, we cannot formally rule out cCMVi in the two others who were  
334 classified as having post-natal infection, since sensitivity of PCR detection of CMV DNA in  
335 newborn blood spots is only approximately 84% [35], and newborn saliva or urine were not

336 available. However, this is unlikely given that only a small minority of infants have cCMVi, even  
337 among those born to HIV-infected women. Furthermore, it is striking that genotypes in babies  
338 with proven cCMVi were highly similar to maternal cervical genotypes, while those with negative  
339 tests for the first six weeks of life were not, and the strains detected later in the blood of these  
340 two infants were most similar to those in their mothers' breast milk.

341

342 While it has previously been noted that a severe genetic bottleneck occurs during CMV  
343 transmission from mother to fetus or infant [19, 31, 36], it remains unknown whether CMV  
344 transmitted/founder virus populations share genotypic features that confer a fitness advantage  
345 for establishing an initial infection, such as seen in HIV [37]. Notwithstanding the apparent  
346 dominance of one genotype in each of the cervical samples, our analysis did not show evidence  
347 for inter-patient convergence of cervical genotypes per se. Rather the three cervical genotypes  
348 that were detected in babies 12, 22 and 123, who were infected at birth showed a higher level of  
349 genetic similarity than over 99.6% of other subset comparisons and much greater than would be  
350 expected by chance (black line) (Fig. S7). Nineteen genes (Fig. 5, Table 2) had particularly high  
351 ( $p < 0.01$ ) similarity scores. Twelve of the 19 genes with the highest similarity scores (Fig. 5) are  
352 part of the highly diverse RL11 gene family. Uniquely, RL11 genes form an island of linkage within  
353 the otherwise highly recombinant CMV genome [17]. Phylogeny of primate CMV RL11 complexes  
354 recapitulates the evolutionary history of the cognate host, suggesting it to be a potential driver  
355 of CMV co-evolution and speciation [17]. It is intriguing that RL11 family proteins influence tissue  
356 tropism [33] or are immunomodulatory [33, 38-42]. Together with its functional properties (Table  
357 2) and extreme diversity [17], the possibility that within-species CMV RL11 variation may also

358 influence within-host viral adaption to different compartments and/or transplacental  
359 transmission presents a tractable hypothesis that can now be tested. cCMVi is thought to occur  
360 primarily through maternal viremia followed by replication in placental cytotrophoblasts  
361 resulting in spread to the fetus [43]. We speculate that virus sampled in the cervix could be  
362 representative of CMV populations that are capable of infecting and crossing the placenta, rather  
363 than fetal infection ascending directly from the lower genital tract. Other genes with high  
364 similarity (FST) scores include US27, which codes for a G-protein-coupled receptor (GPCR)  
365 homologue that modulates signalling of the CXCR4 chemokine and may have a role during viral  
366 entry and egress [44], and US26 whose function is unknown. Less marked but still significantly  
367 different from non-congenitally transmitted strains, UL40 protein [45] modulates NK cell  
368 function. NK cells are the most abundant lymphocytes in placental tissue [43], while UL50 is also  
369 immunomodulatory [46, 47]. Finally, UL74, coding for glycoprotein O, which is highly significantly  
370 similar in all bar one comparisons (Fig. S8), is part of the gL/gH/g) complex which is critical for  
371 tropism and entry into both fibroblasts and epithelial cells [48]. Of interest, gB and gL which  
372 showed considerable diversity in the congenital RhCMV model were, as might be expected, not  
373 represented among the genes sharing significant genetic similarity in our analysis. One possibility  
374 that would unite our findings and those of the congenital RhCMV model is that CMV transmission  
375 bottlenecks are agnostic of variation in genes not implicated in transmission.

376

377 **Table 2.** Open Reading Frames (ORFs) identified by FST as being significantly more similar in  
378 strains transmitted prenatally. LD: Found to contain one of 33 hotspots of genetic linkage  
379 disequilibrium [17].



| ORF    | LD | FUNCTION                                                                            |
|--------|----|-------------------------------------------------------------------------------------|
| UL10   | Y  | Putative membrane glycoprotein, Immunosuppressive impairs T cell function [41]      |
| UL11   | Y  | Membrane glycoprotein modulation of T cell signalling/function [42, 49]             |
| UL13   |    | Unknown function                                                                    |
| UL4    | Y  | Putative membrane glycoprotein [39]                                                 |
| UL5    |    | Putative membrane glycoprotein [39]                                                 |
| UL6    | Y  | Putative membrane glycoprotein [39]                                                 |
| UL7    | Y  | Membrane glycoprotein, modulates chemo-and/or cytokine signalling function [40]     |
| UL8    | Y  | Transmembrane glycoprotein. Inhibits proinflammatory cytokines [40]                 |
| US26   |    | Unknown function                                                                    |
| US27   | Y  | Membrane glycoprotein Activates CXCR4 signalling to increase HCMV replication [44]  |
| UL150A |    | Fibroblast and Epithelial cell entry [50]                                           |
| UL2    |    | Putative membrane glycoprotein [39]                                                 |
| RL11   | Y  | Membrane glycoprotein. Binds IgG Fc domain involved in immune regulation [39]       |
| UL147  |    | $\alpha$ -chemokine homologue [51, 52]                                              |
| UL40   |    | Control of NK recognition [45]                                                      |
| RL13   | Y  | Glycoprotein, repression of replication, bind IgG domain immune regulation [33, 38] |
| RL10   |    | Membrane glycoprotein                                                               |
| UL57   |    | Ss DNA binding protein [39]                                                         |
| UL50   |    | Nuclear Egress complex. Reduces interferon mediated antiviral effect [47]           |

380

381

382

383 Being born to an HIV-infected women is a major risk factor for cCMVi as well as long term CMV-

384 related complications, whether or not the child acquires HIV [8, 9]. We show here that,

385 irrespective of the route of first infection, HIV-exposed uninfected (HEU) children frequently  
386 acquire repeated infections with different CMV viruses within the first year of life. Preliminary  
387 evidence suggests that breast milk of HIV-uninfected women may have lower CMV viral loads  
388 and carry fewer strains [53]. If this is true, the possibility that HEU, as well as HIV-infected, infants  
389 are exposed to greater numbers of CMV strains during infancy as compared with HIV-uninfected  
390 infants, may provide an explanation for their worse clinical outcomes, a hypothesis that can now  
391 be tested in prospective studies. Similarly, these methods promise to be invaluable for studying  
392 the role of maternal CMV reinfection during pregnancy, a question of central importance in the  
393 field [12].

394

395 This study potentially provides several new insights into the pathogenesis of CMV infection.  
396 However, the study is limited by the small number of subjects, the fact that all women were HIV-  
397 1 infected and the lack of samples and data to absolutely confirm the route of CMV acquisition  
398 by these infants. Because we were only able to analyse maternal breast milk, cervical samples  
399 and infant blood, and only intermittently, it is possible that some transmitted viral variants were  
400 not captured. Some, particularly cervical and blood spot samples, had low CMV viral loads and,  
401 as a result, suboptimal genome coverage. Mapping data confirmed that in these cases sequence  
402 loss was random, excluding the possibility of systematic bias. To further address this potential  
403 bias, we subsampled samples with good coverage to identify read-depth thresholds above which  
404 the diversity estimation is robust and haplotype frequency to 5% and above is preserved  
405 (Supplementary Figs. 3 and 7). Analysis of only those samples with read depths above the  
406 identified thresholds supported our overall conclusions. The quality of the sequence and the

407 numbers of samples allowed for conclusions to be drawn at gene level only and precluded robust  
408 identification of putative motifs or single nucleotide polymorphisms associated with biological  
409 differences.

410

411 In summary, by reconstructing the individual CMV haplotypes we found evidence for mixed CMV  
412 infection in HIV-infected women, and compartmentalization of viral strains between cervical and  
413 breast milk. Infants appeared usually to acquire one virus genotype initially, indicating a  
414 transmission bottleneck, though subsequent reinfection with a second virus from maternal  
415 breast milk was common. We also found that viruses transmitted congenitally resembled the  
416 virus genotypes that were present at highest abundance in cervix, and shared genetic features  
417 that distinguished them from CMV strains predominating in breast milk and in the cervixes of  
418 women whose infants were apparently first infected post-partum. These data provide new  
419 testable insights into the pathogenesis of CMV transmission from mothers to their infants, as  
420 well as tools to unravel the importance of viral diversity for reinfection and congenital  
421 transmission, questions that are central to the development of a vaccine to prevent the global  
422 burden of disease due to CMV.

423

## 424 **Materials and Methods**

425 Samples were approved for research by the Institutional Review Board of the University of  
426 Washington and the Ethics and Research Committee of Kenyatta National Hospital IRB  
427 NCT00530777 and sequenced under the ULCP Biobank REC approval. Approval for use of  
428 anonymised residual diagnostic specimens were obtained through the University College  
429 London/University College London Hospitals (UCL/UCLH) Pathogen Biobank National Research  
430 Ethics Service Committee London Fulham (Research Ethics Committee reference: 12/LO/1089).  
431 Informed patient consent was not required.

432

### 433 **Patient specimens**

434 Mother-child pairs were selected from a randomized, placebo-controlled trial to determine the  
435 impact of twice-daily valacyclovir (500 mg) on breast milk HIV RNA viral load in HIV-1/HSV-2 co-  
436 infected women (NCT 00530777). Trial design, participant characteristics, and follow-up have  
437 been reported elsewhere, [21-23] and the University of Washington Institutional Review Board  
438 and Kenyatta National Hospital Research and Ethics Committee approved the research. Women  
439 received short course antiretrovirals for prevention of mother-to-child HIV transmission, but no  
440 women or infants received combination antiretroviral therapy, as the study was conducted  
441 before recommendations for universal treatment. All women were HIV-1, HSV-2 and CMV co-  
442 infected. For this CMV genomics study, we selected 5 mother-infant pairs from the placebo arm  
443 with HIV-exposed uninfected infants, who had well-defined timing of infant CMV infection.  
444 Women had cervical swabs and blood specimens collected at 34- and 38-weeks gestation.  
445 Maternal blood and infant dried blood spots were collected delivery, then postpartum at 2, 6,

446 10, 14, 24, 36, and 52 weeks. Breast milk was collected at all times after delivery. Blood plasma,  
447 cervical swabs, and breast milk supernatant (whey) was cryopreserved at  $-80$  C for the study of  
448 HIV and other co-infections.

449

#### 450 **DNA extraction and CMV DNA measurement**

451 Viral nucleic acids were extracted from blood plasma, dried blood spots, breast milk supernatant  
452 and cervical swabs as previously described using the Qiagen UltraSens Viral Nucleic Acid  
453 extraction kit [22]. Quantitative real-time PCR was used to measure CMV DNA levels in these  
454 specimens [22].

455

#### 456 **Sure-select sequencing**

457 Hybridization and library preparation was performed as previously described [54]. Briefly,  
458 extracted DNA was sheared by acoustic sonication (Covaris e220, Covaris Inc.). DNA fragments  
459 underwent end-repair, A'-tailing, and (Illumina) adaptor ligation. DNA libraries were hybridised  
460 with biotinylated 120-mer custom RNA baits designed using all available CMV full genomes in  
461 Genbank for 16-24 hrs at  $65^{\circ}\text{C}$  and subsequently bound to MyOne™ Streptavidin T1 Dynabeads™  
462 (ThermoFisher Scientific). Following washing, libraries were amplified (18 cycles) to generate  
463 sufficient input material for Illumina sequencing. Paired end sequencing was performed on an  
464 Illumina MiSeq using the 500 cycle v2 Reagent Kit (Illumina, MS-102-2003). Samples were  
465 sequenced in four different batches by family group.

466

467 Reads generated were quality checked and mapped to the Merlin Reference sequence followed  
468 by removal of duplicates using the CLC Genomics Workbench ver. 10.1. Consensus sequence was  
469 extracted with a minimum coverage of 2X. Consensus sequences along with other Genbank  
470 reference sequences were aligned using MAFFT 7.212 [55] and refined by manual editing.

471

#### 472 **Clustering**

473 Pairwise distances between sequences were calculated using the `dist.dna` function from R  
474 package `Ape` v.5.3 [56]. Sequences were clustered using multidimensional scaling as  
475 implemented by the `cmdscale` function from R package `Stats` v.3.6 [57].

476

#### 477 **Nucleotide diversity**

478 Nucleotide diversity was calculated by fitting the observed variant frequency spectrum to the  
479 mixture of two distributions, one representing sequencing errors (represented by a Beta  
480 distribution), the other representing true diversity (represented by a four-dimensional Dirichlet  
481 distribution plus delta function, the latter representing invariant sites). The parameters for these  
482 two distributions were optimized by maximizing the log likelihood. This framework allows all of  
483 the sequencing data to be used and does not require pre-filtering the data to remove sites with  
484 low read depth or few variants resulting in the favorable robustness to read depth, as shown in  
485 Fig. S3. Software is available for download at GitHub Repository, [https://github.com/ucl-](https://github.com/ucl-pathgenomics/NucleotideDiversity)  
486 [pathgenomics/NucleotideDiversity](https://github.com/ucl-pathgenomics/NucleotideDiversity).

487

#### 488 **Haplotype reconstruction**

489 Haplotype reconstruction was accomplished using HaROLD with default settings [25]. Details of  
490 this procedure are described in the associated publications. In brief, HaROLD employs a two-step  
491 process. The first step is based on the assumption that there are a limited number of haplotypes  
492 that are the same for all of the samples from a given mother/ child data set, so that the  
493 differences in the frequencies of polymorphisms represent different mixtures of these  
494 haplotypes. By taking advantage of the co-variation of variant frequencies, HaROLD creates a set  
495 of haplotypes for each of the data sets, optimized so that linear combinations of these haplotypes  
496 can best account for the observed variant frequencies. The number of haplotypes is chosen to  
497 maximize the log likelihood of the observed frequencies. The second step involves relaxing the  
498 assumption of constant haplotypes, with each sample treated individually. For each sample,  
499 reads are assigned probabilistically to the various haplotypes generated by the first step. These  
500 haplotype sequences and frequencies are then adjusted based on the assigned reads. The reads  
501 are then re-assigned to these adjusted haplotypes, and the procedure is repeated until  
502 convergence. During this process, haplotypes can be merged if that decreases the Akaike  
503 Information Criterion (AIC) [58]. This procedure results in a set of haplotypes for each sample,  
504 loosely based on the haplotypes derived from the first step.

505

#### 506 **Haplotype trees**

507 Maximum Likelihood trees of the haplotypes from each family were computed using RaxML  
508 v8.2.10, implementing the GTR model, with 1000 bootstrap replicates [59].

509

#### 510 **Haplotype clustering**

511 The haplotypes for each mother/baby data set were divided into genotypes. We calculated the  
512 pairwise evolutionary distance (the sum of distances on the evolutionary tree between the  
513 haplotypes and their latest common ancestor) for all pairs of haplotypes in each family. As shown  
514 in Fig. S9, the observed distribution of such pairwise distances fits the sum of a Gamma  
515 distribution (69.3%,  $\alpha = 19.5$ ,  $\beta = 0.0015$ ) and an exponential distribution (30.7%, mean =  
516 0.01), indicative of two classes of relationships – pairs of sequences that are highly similar,  
517 modelled by the exponential, representing small accumulated variations, and pairs that are more  
518 distinct, represented by the Gamma distribution. We chose the crossing point of these two  
519 distributions, at a cut-off distance of 0.017, as differentiating small variations from larger  
520 differences (Fig. S9). We then grouped the haplotypes into clusters so that all members of a  
521 cluster have a pairwise evolutionary distance with all other members less than 0.017, resulting in  
522 26 clusters which we refer to as genotypes. We used these groups to assign colours to the  
523 different haplotype-clusters (genotypes) in Fig. 4 and Fig. S5.

524

525 **Fig. S9.** Distribution of pairwise evolutionary distances for haplotypes within families. Black,  
526 observed distribution of pairwise evolutionary distances; green, gamma distribution; blue,  
527 exponential distribution; orange, sum of Gamma distribution plus Exponential Distribution.

528



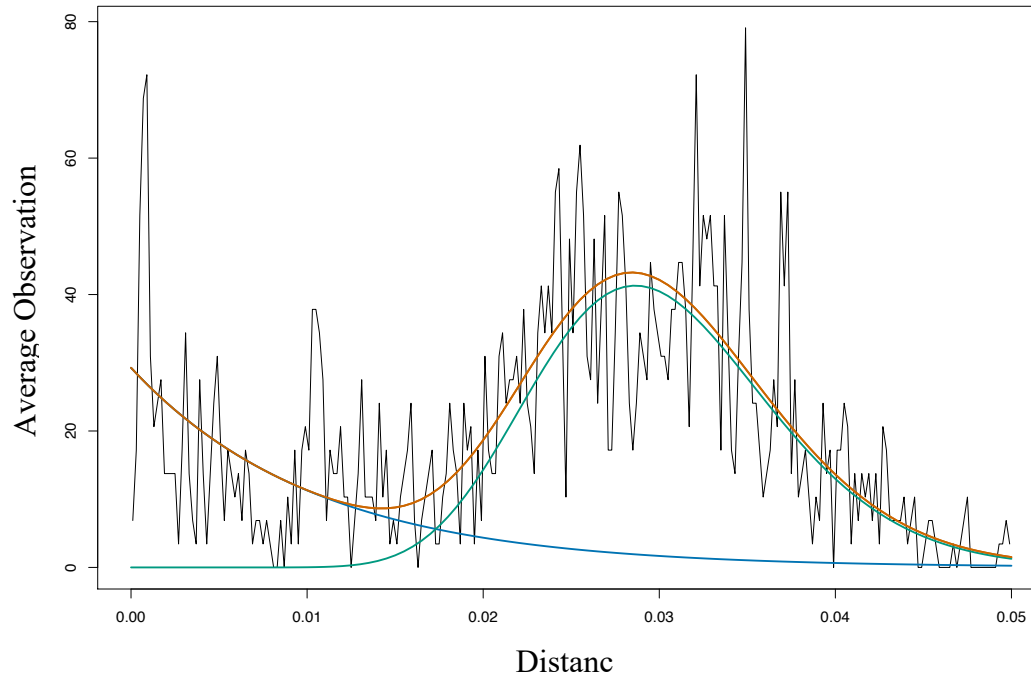

529

530

531 We used  $F_{ST}$  to identify sequence characteristics associated with sets of genotypes. Consensus  
532 sequences were constructed for each genotype.  $F_{ST}$  values, representing the genetic difference  
533 between a subset of genotypes and the other genotypes, were calculated for each gene. P-values  
534 and corresponding false discovery rates were estimated by non-parametric bootstrapping,  
535 through scrambling the bases at each position amongst the clusters. The results are shown for  
536 the 26 genotypes obtained with a cut-off distance of 0.017; changing this cut-off resulted in  
537 increased or decreased numbers of genotypes, but yielded similar results, especially for the more  
538 confident identifications (Fig. S8).

539

#### 540 **Evaluating the similarity between subsets of genotypes**

541 We use  $F_{ST}$  values to identify similarities between individual genes from subsets of genotypes  
542 compared with the other genotypes. In order to compare the magnitude of the similarities of

543 different subsets, we would like to take the sum of the  $F_{ST}$  values for all genes where the  
544 similarities are real and not the result of random associations. As we cannot definitively identify  
545 these genes, we instead consider the sum of the  $F_{ST}$  values for all genes weighted by our  
546 confidence that the  $F_{ST}$  value is significant, represented as one minus the false discovery rate.

547

## 548 Acknowledgments

549 We acknowledge the support of the MRC/NIHR UCLH/UCL Biomedical Research Centre funded  
550 Pathogen Genomics Unit. This work was funded by EUFP7 grant 304875 (PI Breuer), Wellcome  
551 Trust grant 204870 (PI Griffiths), NIH National Institute of Allergy and Infectious Diseases grant  
552 AI087369 (PI Slyker), AI027757 (PI Slyker, Holmes), AI076105 and K24 AI087399 (Farquhar),  
553 National Institute of Child Health and Human Development HD057773–01, HD054314 (Farquhar).  
554 JP is funded by a Rosetrees Trust PhD Studentship M876. SM and J Bryant are funded by Henry  
555 Wellcome fellowships. J Breuer receives funding from the UCL/UCLH NIHR Biomedical Research  
556 Centre.

557

## 558 Data availability

559 Sequence reads have been deposited in NCBI Sequence Read Archive under BioProject ID  
560 PRJNA605798.

561

562 All software used are available for download at GitHub Repository, [https://github.com/ucl-](https://github.com/ucl-pathgenomics/NucleotideDiversity)  
563 [pathgenomics/NucleotideDiversity](https://github.com/ucl-pathgenomics/NucleotideDiversity) and <https://github.com/ucl-pathgenomics/HAROLD>.

564

565 **References**

- 566 1. Morton CC, Nance WE. Newborn hearing screening--a silent revolution. *N Engl J Med.*  
567 2006;354(20):2151-64. Epub 2006/05/19. doi: 10.1056/NEJMra050700. PubMed PMID:  
568 16707752.
- 569 2. Boppana SB, Ross SA, Fowler KB. Congenital cytomegalovirus infection: clinical outcome.  
570 *Clinical infectious diseases : an official publication of the Infectious Diseases Society of America.*  
571 2013;57 Suppl 4:S178-81. Epub 2013/12/07. doi: 10.1093/cid/cit629. PubMed PMID: 24257422.
- 572 3. Dollard SC, Grosse SD, Ross DS. New estimates of the prevalence of neurological and  
573 sensory sequelae and mortality associated with congenital cytomegalovirus infection. *Rev Med*  
574 *Virol.* 2007;17(5):355-63. Epub 2007/06/02. doi: 10.1002/rmv.544. PubMed PMID: 17542052.
- 575 4. Gantt S, Orem J, Krantz EM, Morrow RA, Selke S, Huang ML, et al. Prospective  
576 Characterization of the Risk Factors for Transmission and Symptoms of Primary Human  
577 Herpesvirus Infections Among Ugandan Infants. *J Infect Dis.* 2016;214(1):36-44. doi:  
578 10.1093/infdis/jiw076. PubMed PMID: 26917575; PubMed Central PMCID: PMC4907408.
- 579 5. Gantt S, Leister E, Jacobsen DL, Boucoiran I, Huang ML, Jerome KR, et al. Risk of congenital  
580 cytomegalovirus infection among HIV-exposed uninfected infants is not decreased by maternal  
581 nelfinavir use during pregnancy. *J Med Virol.* 2016;88(6):1051-8. doi: 10.1002/jmv.24420.  
582 PubMed PMID: 26519647; PubMed Central PMCID: PMC4818099.
- 583 6. Slyker JA, Richardson B, Chung MH, Atkinson C, Asbjornsdottir KH, Lehman DA, et al.  
584 Maternal Highly Active Antiretroviral Therapy Reduces Vertical Cytomegalovirus Transmission  
585 But Does Not Reduce Breast Milk Cytomegalovirus Levels. *AIDS Res Hum Retroviruses.*

- 586 2017;33(4):332-8. Epub 2016/11/01. doi: 10.1089/AID.2016.0121. PubMed PMID: 27796131;  
587 PubMed Central PMCID: PMC5372773.
- 588 7. Richardson BA, John-Stewart G, Atkinson C, Nduati R, Asbjornsdottir K, Boeckh M, et al.  
589 Vertical Cytomegalovirus Transmission From HIV-Infected Women Randomized to Formula-Feed  
590 or Breastfeed Their Infants. *J Infect Dis.* 2016;213(6):992-8. doi: 10.1093/infdis/jiv515. PubMed  
591 PMID: 26518046; PubMed Central PMCID: PMC4760415.
- 592 8. Garcia-Knight MA, Nduati E, Hassan AS, Nkumama I, Etyang TJ, Hajj NJ, et al.  
593 Cytomegalovirus viraemia is associated with poor growth and T-cell activation with an increased  
594 burden in HIV-exposed uninfected infants. *AIDS.* 2017;31(13):1809-18. Epub 2017/06/14. doi:  
595 10.1097/QAD.0000000000001568. PubMed PMID: 28609400; PubMed Central PMCID:  
596 PMC5538302.
- 597 9. Gompels UA, Larke N, Sanz-Ramos M, Bates M, Musonda K, Manno D, et al. Human  
598 cytomegalovirus infant infection adversely affects growth and development in maternally HIV-  
599 exposed and unexposed infants in Zambia. *Clinical infectious diseases : an official publication of*  
600 *the Infectious Diseases Society of America.* 2012;54(3):434-42. doi: 10.1093/cid/cir837. PubMed  
601 PMID: 22247303; PubMed Central PMCID: PMC3258277.
- 602 10. Hsiao NY, Zampoli M, Morrow B, Zar HJ, Hardie D. Cytomegalovirus viraemia in HIV  
603 exposed and infected infants: prevalence and clinical utility for diagnosing CMV pneumonia. *J Clin*  
604 *Viro.* 2013;58(1):74-8. Epub 2013/06/04. doi: 10.1016/j.jcv.2013.05.002. PubMed PMID:  
605 23727304.

- 606 11. Kenneson A, Cannon MJ. Review and meta-analysis of the epidemiology of congenital  
607 cytomegalovirus (CMV) infection. *Rev Med Virol.* 2007;17(4):253-76. Epub 2007/06/21. doi:  
608 10.1002/rmv.535. PubMed PMID: 17579921.
- 609 12. Britt WJ. Congenital Human Cytomegalovirus Infection and the Enigma of Maternal  
610 Immunity. *J Virol.* 2017;91(15). doi: 10.1128/JVI.02392-16. PubMed PMID: 28490582; PubMed  
611 Central PMCID: PMCPMC5512250.
- 612 13. de Vries JJ, van Zwet EW, Dekker FW, Kroes AC, Verkerk PH, Vossen AC. The apparent  
613 paradox of maternal seropositivity as a risk factor for congenital cytomegalovirus infection: a  
614 population-based prediction model. *Rev Med Virol.* 2013;23(4):241-9. doi: 10.1002/rmv.1744.  
615 PubMed PMID: 23559569.
- 616 14. Boppana SB, Fowler KB, Britt WJ, Stagno S, Pass RF. Symptomatic congenital  
617 cytomegalovirus infection in infants born to mothers with preexisting immunity to  
618 cytomegalovirus. *Pediatrics.* 1999;104(1 Pt 1):55-60. PubMed PMID: 10390260.
- 619 15. Boucoiran I, Mayer BT, Krantz EM, Marchant A, Pati S, Boppana S, et al. Nonprimary  
620 Maternal Cytomegalovirus Infection After Viral Shedding in Infants. *Pediatr Infect Dis J.*  
621 2018;37(7):627-31. Epub 2018/06/12. doi: 10.1097/INF.0000000000001877. PubMed PMID:  
622 29889809; PubMed Central PMCID: PMCPMC6016842.
- 623 16. Barbosa NG, Yamamoto AY, Duarte G, Aragon DC, Fowler KB, Boppana S, et al.  
624 Cytomegalovirus Shedding in Seropositive Pregnant Women From a High-Seroprevalence  
625 Population: The Brazilian Cytomegalovirus Hearing and Maternal Secondary Infection Study.  
626 *Clinical infectious diseases : an official publication of the Infectious Diseases Society of America.*

- 627 2018;67(5):743-50. Epub 2018/03/01. doi: 10.1093/cid/ciy166. PubMed PMID: 29490030;  
628 PubMed Central PMCID: PMC6094000.
- 629 17. Lassalle F, Depledge DP, Reeves MB, Brown AC, Christiansen MT, Tutill HJ, et al. Islands of  
630 linkage in an ocean of pervasive recombination reveals two-speed evolution of human  
631 cytomegalovirus genomes. *Virus Evol.* 2016;2(1):vew017. Epub 2016/06/15. doi:  
632 10.1093/ve/vew017. PubMed PMID: 30288299; PubMed Central PMCID: PMC6167919.
- 633 18. Pokalyuk C, Renzette N, Irwin KK, Pfeifer SP, Gibson L, Britt WJ, et al. Characterizing human  
634 cytomegalovirus reinfection in congenitally infected infants: an evolutionary perspective. *Mol*  
635 *Ecol.* 2017;26(7):1980-90. Epub 2016/12/19. doi: 10.1111/mec.13953. PubMed PMID: 27988973.
- 636 19. Sackman AM, Pfeifer SP, Kowalik TF, Jensen JD. On the Demographic and Selective Forces  
637 Shaping Patterns of Human Cytomegalovirus Variation within Hosts. *Pathogens.* 2018;7(1). Epub  
638 2018/02/01. doi: 10.3390/pathogens7010016. PubMed PMID: 29382090; PubMed Central  
639 PMCID: PMC5874742.
- 640 20. Cudini J, Roy S, Houldcroft CJ, Bryant JM, Depledge DP, Tutill H, et al. Human  
641 cytomegalovirus haplotype reconstruction reveals high diversity due to superinfection and  
642 evidence of within-host recombination. *Proc Natl Acad Sci U S A.* 2019;116(12):5693-8. Epub  
643 2019/03/02. doi: 10.1073/pnas.1818130116. PubMed PMID: 30819890; PubMed Central PMCID:  
644 PMC6431178.
- 645 21. Drake AL, Roxby AC, Ongecha-Owuor F, Kiarie J, John-Stewart G, Wald A, et al. Valacyclovir  
646 suppressive therapy reduces plasma and breast milk HIV-1 RNA levels during pregnancy and  
647 postpartum: a randomized trial. *J Infect Dis.* 2012;205(3):366-75. Epub 2011/12/08. doi:  
648 10.1093/infdis/jir766. PubMed PMID: 22147786; PubMed Central PMCID: PMC3256951.

- 649 22. Roxby AC, Atkinson C, Asbjornsdottir K, Farquhar C, Kiarie JN, Drake AL, et al. Maternal  
650 valacyclovir and infant cytomegalovirus acquisition: a randomized controlled trial among HIV-  
651 infected women. PloS one. 2014;9(2):e87855. doi: 10.1371/journal.pone.0087855. PubMed  
652 PMID: 24504006; PubMed Central PMCID: PMC3913686.
- 653 23. Slyker J, Farquhar C, Atkinson C, Asbjornsdottir K, Roxby A, Drake A, et al.  
654 Compartmentalized cytomegalovirus replication and transmission in the setting of maternal HIV-  
655 1 infection. Clinical infectious diseases : an official publication of the Infectious Diseases Society  
656 of America. 2014;58(4):564-72. doi: 10.1093/cid/cit727. PubMed PMID: 24192386; PubMed  
657 Central PMCID: PMCPMC3905754.
- 658 24. Suarez NM, Musonda KG, Escriva E, Njenga M, Agbueze A, Camiolo S, et al. Multiple-Strain  
659 Infections of Human Cytomegalovirus With High Genomic Diversity Are Common in Breast Milk  
660 From Human Immunodeficiency Virus-Infected Women in Zambia. J Infect Dis. 2019;220(5):792-  
661 801. Epub 2019/05/06. doi: 10.1093/infdis/jiz209. PubMed PMID: 31050737; PubMed Central  
662 PMCID: PMCPMC6667993.
- 663 25. Goldstein RA, Tamuri AU, Roy S, Breuer J. Haplotype assignment of virus NGS data using  
664 co-variation of variant frequencies. bioRxiv. 2018. doi: <https://doi.org/10.1101/444877>.
- 665 26. Renzette N, Bhattacharjee B, Jensen JD, Gibson L, Kowalik TF. Extensive genome-wide  
666 variability of human cytomegalovirus in congenitally infected infants. PLoS Pathog.  
667 2011;7(5):e1001344. Epub 2011/06/01. doi: 10.1371/journal.ppat.1001344. PubMed PMID:  
668 21625576; PubMed Central PMCID: PMCPMC3098220.
- 669 27. Puchhammer-Stockl E, Gorzer I, Zoufaly A, Jaksch P, Bauer CC, Klepetko W, et al.  
670 Emergence of multiple cytomegalovirus strains in blood and lung of lung transplant recipients.

- 671 Transplantation. 2006;81(2):187-94. Epub 2006/01/27. doi:  
672 10.1097/01.tp.0000194858.50812.cb. PubMed PMID: 16436961.
- 673 28. Hage E, Wilkie GS, Linnenweber-Held S, Dhingra A, Suarez NM, Schmidt JJ, et al.  
674 Characterization of Human Cytomegalovirus Genome Diversity in Immunocompromised Hosts by  
675 Whole-Genome Sequencing Directly From Clinical Specimens. *J Infect Dis.* 2017;215(11):1673-83.  
676 Epub 2017/04/04. doi: 10.1093/infdis/jix157. PubMed PMID: 28368496.
- 677 29. Kadambari S, Atkinson C, Luck S, Macartney M, Conibear T, Harrison I, et al. Characterising  
678 variation in five genetic loci of cytomegalovirus during treatment for congenital infection. *J Med*  
679 *Virol.* 2017;89(3):502-7. Epub 2016/08/04. doi: 10.1002/jmv.24654. PubMed PMID: 27486960.
- 680 30. Ross SA, Novak Z, Pati S, Patro RK, Blumenthal J, Danthuluri VR, et al. Mixed infection and  
681 strain diversity in congenital cytomegalovirus infection. *J Infect Dis.* 2011;204(7):1003-7. Epub  
682 2011/09/02. doi: 10.1093/infdis/jir457. PubMed PMID: 21881114; PubMed Central PMCID:  
683 PMC3164425.
- 684 31. Renzette N, Gibson L, Bhattacharjee B, Fisher D, Schleiss MR, Jensen JD, et al. Rapid  
685 intrahost evolution of human cytomegalovirus is shaped by demography and positive selection.  
686 *PLoS Genet.* 2013;9(9):e1003735. doi: 10.1371/journal.pgen.1003735. PubMed PMID:  
687 24086142; PubMed Central PMCID: PMC3784496.
- 688 32. Vera Cruz D, Nelson CS, Tran D, Barry PA, Kaur A, Koelle K, et al. Intrahost cytomegalovirus  
689 population genetics following antibody pretreatment in a monkey model of congenital  
690 transmission. *PLoS Pathog.* 2020;16(2):e1007968. Epub 2020/02/15. doi:  
691 10.1371/journal.ppat.1007968. PubMed PMID: 32059027.



- 692 33. Stanton RJ, Baluchova K, Dargan DJ, Cunningham C, Sheehy O, Seirafian S, et al.  
693 Reconstruction of the complete human cytomegalovirus genome in a BAC reveals RL13 to be a  
694 potent inhibitor of replication. *J Clin Invest.* 2010;120(9):3191-208. Epub 2010/08/04. doi:  
695 10.1172/JCI42955. PubMed PMID: 20679731; PubMed Central PMCID: PMCPMC2929729.
- 696 34. Hansen SG, Powers CJ, Richards R, Ventura AB, Ford JC, Siess D, et al. Evasion of CD8+ T  
697 cells is critical for superinfection by cytomegalovirus. *Science.* 2010;328(5974):102-6. Epub  
698 2010/04/03. doi: 10.1126/science.1185350. PubMed PMID: 20360110; PubMed Central PMCID:  
699 PMCPMC2883175.
- 700 35. Wang L, Xu X, Zhang H, Qian J, Zhu J. Dried blood spots PCR assays to screen congenital  
701 cytomegalovirus infection: a meta-analysis. *Viol J.* 2015;12:60. doi: 10.1186/s12985-015-0281-  
702 9. PubMed PMID: 25889596; PubMed Central PMCID: PMCPMC4408583.
- 703 36. Mayer BT, Krantz EM, Swan D, Ferrenberg J, Simmons K, Selke S, et al. Transient Oral  
704 Human Cytomegalovirus Infections Indicate Inefficient Viral Spread from Very Few Initially  
705 Infected Cells. *J Virol.* 2017;91(12). doi: 10.1128/JVI.00380-17. PubMed PMID: 28381570;  
706 PubMed Central PMCID: PMCPMC5446638.
- 707 37. Joseph SB, Swanstrom R, Kashuba AD, Cohen MS. Bottlenecks in HIV-1 transmission:  
708 insights from the study of founder viruses. *Nat Rev Microbiol.* 2015;13(7):414-25. doi:  
709 10.1038/nrmicro3471. PubMed PMID: 26052661; PubMed Central PMCID: PMCPMC4793885.
- 710 38. Cortese M, Calo S, D'Aurizio R, Lilja A, Pacchiani N, Merola M. Recombinant human  
711 cytomegalovirus (HCMV) RL13 binds human immunoglobulin G Fc. *PloS one.* 2012;7(11):e50166.  
712 Epub 2012/12/12. doi: 10.1371/journal.pone.0050166. PubMed PMID: 23226246; PubMed  
713 Central PMCID: PMCPMC3511460.

- 714 39. Van Damme E, Van Loock M. Functional annotation of human cytomegalovirus gene  
715 products: an update. *Front Microbiol.* 2014;5:218. Epub 2014/06/07. doi:  
716 10.3389/fmicb.2014.00218. PubMed PMID: 24904534; PubMed Central PMCID:  
717 PMC4032930.
- 718 40. Perez-Carmona N, Martinez-Vicente P, Farre D, Gabaev I, Messerle M, Engel P, et al. A  
719 Prominent Role of the Human Cytomegalovirus UL8 Glycoprotein in Restraining Proinflammatory  
720 Cytokine Production by Myeloid Cells at Late Times during Infection. *J Virol.* 2018;92(9). Epub  
721 2018/02/23. doi: 10.1128/JVI.02229-17. PubMed PMID: 29467314; PubMed Central PMCID:  
722 PMC5899185.
- 723 41. Bruno L, Cortese M, Monda G, Gentile M, Calo S, Schiavetti F, et al. Human  
724 cytomegalovirus pUL10 interacts with leukocytes and impairs TCR-mediated T-cell activation.  
725 *Immunol Cell Biol.* 2016;94(9):849-60. Epub 2016/10/19. doi: 10.1038/icb.2016.49. PubMed  
726 PMID: 27192938.
- 727 42. Gabaev I, Elbasani E, Ameres S, Steinbruck L, Stanton R, Doring M, et al. Expression of the  
728 human cytomegalovirus UL11 glycoprotein in viral infection and evaluation of its effect on virus-  
729 specific CD8 T cells. *J Virol.* 2014;88(24):14326-39. Epub 2014/10/03. doi: 10.1128/JVI.01691-14.  
730 PubMed PMID: 25275132; PubMed Central PMCID: PMC4249143.
- 731 43. Pereira L, Tabata T, Petitt M, Fang-Hoover J. Congenital cytomegalovirus infection  
732 undermines early development and functions of the human placenta. *Placenta.* 2017;59 Suppl  
733 1:S8-S16. Epub 2017/05/10. doi: 10.1016/j.placenta.2017.04.020. PubMed PMID: 28477968.
- 734 44. Frank T, Niemann I, Reichel A, Stamminger T. Emerging roles of cytomegalovirus-encoded  
735 G protein-coupled receptors during lytic and latent infection. *Med Microbiol Immunol.*

- 736 2019;208(3-4):447-56. Epub 2019/03/23. doi: 10.1007/s00430-019-00595-9. PubMed PMID:  
737 30900091.
- 738 45. Heatley SL, Pietra G, Lin J, Widjaja JM, Harpur CM, Lester S, et al. Polymorphism in human  
739 cytomegalovirus UL40 impacts on recognition of human leukocyte antigen-E (HLA-E) by natural  
740 killer cells. *J Biol Chem.* 2013;288(12):8679-90. Epub 2013/01/22. doi:  
741 10.1074/jbc.M112.409672. PubMed PMID: 23335510; PubMed Central PMCID:  
742 PMCPMC3605686.
- 743 46. Lee MK, Kim YJ, Kim YE, Han TH, Milbradt J, Marschall M, et al. Transmembrane Protein  
744 pUL50 of Human Cytomegalovirus Inhibits ISGylation by Downregulating UBE1L. *J Virol.*  
745 2018;92(15). Epub 2018/05/11. doi: 10.1128/JVI.00462-18. PubMed PMID: 29743376; PubMed  
746 Central PMCID: PMCPMC6052311.
- 747 47. DeRussy BM, Boland MT, Tandon R. Human Cytomegalovirus pUL93 Links Nucleocapsid  
748 Maturation and Nuclear Egress. *J Virol.* 2016;90(16):7109-17. Epub 2016/05/27. doi:  
749 10.1128/JVI.00728-16. PubMed PMID: 27226374; PubMed Central PMCID: PMCPMC4984640.
- 750 48. Wu Y, Prager A, Boos S, Resch M, Brizic I, Mach M, et al. Human cytomegalovirus  
751 glycoprotein complex gH/gL/gO uses PDGFR-alpha as a key for entry. *PLoS Pathog.*  
752 2017;13(4):e1006281. Epub 2017/04/14. doi: 10.1371/journal.ppat.1006281. PubMed PMID:  
753 28403202; PubMed Central PMCID: PMCPMC5389851.
- 754 49. Zischke J, Mamareli P, Pokoyski C, Gabaev I, Buyny S, Jacobs R, et al. The human  
755 cytomegalovirus glycoprotein pUL11 acts via CD45 to induce T cell IL-10 secretion. *PLoS Pathog.*  
756 2017;13(6):e1006454. Epub 2017/06/20. doi: 10.1371/journal.ppat.1006454. PubMed PMID:  
757 28628650; PubMed Central PMCID: PMCPMC5491327.

- 758 50. Gatherer D, Seirafian S, Cunningham C, Holton M, Dargan DJ, Baluchova K, et al. High-  
759 resolution human cytomegalovirus transcriptome. *Proc Natl Acad Sci U S A*. 2011;108(49):19755-  
760 60. Epub 2011/11/24. doi: 10.1073/pnas.1115861108. PubMed PMID: 22109557; PubMed  
761 Central PMCID: PMCPMC3241806.
- 762 51. Lurain NS, Fox AM, Lichy HM, Bhorade SM, Ware CF, Huang DD, et al. Analysis of the  
763 human cytomegalovirus genomic region from UL146 through UL147A reveals sequence  
764 hypervariability, genotypic stability, and overlapping transcripts. *Viol J*. 2006;3:4. Epub  
765 2006/01/18. doi: 10.1186/1743-422X-3-4. PubMed PMID: 16409621; PubMed Central PMCID:  
766 PMCPMC1360065.
- 767 52. Arav-Boger R, Foster CB, Zong JC, Pass RF. Human cytomegalovirus-encoded alpha -  
768 chemokines exhibit high sequence variability in congenitally infected newborns. *J Infect Dis*.  
769 2006;193(6):788-91. Epub 2006/02/16. doi: 10.1086/500508. PubMed PMID: 16479512.
- 770 53. Arcangeletti MC, Vasile Simone R, Rodighiero I, De Conto F, Medici MC, Martorana D, et  
771 al. Combined genetic variants of human cytomegalovirus envelope glycoproteins as congenital  
772 infection markers. *Viol J*. 2015;12:202. Epub 2015/11/28. doi: 10.1186/s12985-015-0428-8.  
773 PubMed PMID: 26611326; PubMed Central PMCID: PMCPMC4662005.
- 774 54. Houldcroft CJ, Bryant JM, Depledge DP, Margetts BK, Simmonds J, Nicolaou S, et al.  
775 Detection of Low Frequency Multi-Drug Resistance and Novel Putative Maribavir Resistance in  
776 Immunocompromised Pediatric Patients with Cytomegalovirus. *Front Microbiol*. 2016;7:1317.  
777 Epub 2016/09/27. doi: 10.3389/fmicb.2016.01317. PubMed PMID: 27667983; PubMed Central  
778 PMCID: PMCPMC5016526.

- 779 55. Katoh K, Standley DM. MAFFT multiple sequence alignment software version 7:  
780 improvements in performance and usability. *Mol Biol Evol.* 2013;30(4):772-80. Epub 2013/01/19.  
781 doi: 10.1093/molbev/mst010. PubMed PMID: 23329690; PubMed Central PMCID:  
782 PMCPMC3603318.
- 783 56. Paradis E, Schliep K. ape 5.0: an environment for modern phylogenetics and evolutionary  
784 analyses in R. *Bioinformatics.* 2019;35(3):526-8. Epub 2018/07/18. doi:  
785 10.1093/bioinformatics/bty633. PubMed PMID: 30016406.
- 786 57. Team RC. A language and environment for statistical computing. R Foundation for  
787 Statistical Computing. Vienna, Austria2012.
- 788 58. Akaike H. Information theory and an extension of the maximum likelihood principle. 2nd  
789 International Symposium on Information Theory (BN Petrov and F Cs ä ki, eds); Akademiai Ki à  
790 do, Budapest1973.
- 791 59. Stamatakis A. RAxML version 8: a tool for phylogenetic analysis and post-analysis of large  
792 phylogenies. *Bioinformatics.* 2014;30(9):1312-3. Epub 2014/01/24. doi:  
793 10.1093/bioinformatics/btu033. PubMed PMID: 24451623; PubMed Central PMCID:  
794 PMCPMC3998144.
- 795
- 796
- 797
